# Supplementary material for: Role of π-spacer in regulating the photovoltaic performance of copper electrolyte dye-sensitized solar cells using triphenylimidazole dyes
Source: Royal Society of Chemistry journal article supplement (doi:10.1039/d1ma00852h), 2021-12-01
Supplement: d1ma00852h1.pdf [file d1ma00852h1.pdf]

## Supporting Information

### **Role of $\pi$ -spacer in Regulating the Photovoltaic Performance of Copper Electrolyte Dye-sensitized Solar Cells Using Triphenylimidazole Dyes**

*Palivela Siva Gangadhar,<sup>a,c‡</sup> Anooja Jagadeesh,<sup>b,c‡</sup> Manne Naga Rajesh,<sup>a,c</sup> Andrew Simon George,<sup>b,c</sup> Seelam Prasanthkumar,<sup>a,c</sup> Suraj Soman,<sup>b,c\*</sup> Lingamallu Giribabu<sup>a,c\*</sup>*

<sup>a</sup>Polymer and Functional Materials Division, CSIR-Indian Institute of Chemical Technology, Hyderabad 500007, Telangana, India. E-mail: giribabu@iict.res.in

<sup>b</sup>Photosciences and Photonics Section, Chemical Sciences and Technology Division, CSIR-National Institute for Interdisciplinary Science and Technology (CSIR-NIIST), Thiruvananthapuram 695019, India. E-mail: suraj@niist.res.in

<sup>c</sup>Academy of Scientific and Innovative Research (AcSIR), Ghaziabad, New Delhi 201002, India.

<sup>‡</sup>These authors contributed equally towards the completion of this work

| <b>Table of Contents</b> |                                                                                                                                                                                        | <b>Page No.</b> |
|--------------------------|----------------------------------------------------------------------------------------------------------------------------------------------------------------------------------------|-----------------|
| <b>Figure S1</b>         | Molecular structures of LG-P1 and LG-P3 sensitizers.                                                                                                                                   | S4              |
| <b>Figure S2</b>         | <i><sup>1</sup>H NMR spectrum (400 MHz, CDCl<sub>3</sub>) of 4.</i>                                                                                                                    | S4              |
| <b>Figure S3</b>         | <i><sup>13</sup>C NMR spectrum (400 MHz, CDCl<sub>3</sub>) of 4.</i>                                                                                                                   | S5              |
| <b>Figure S4</b>         | <i>MALDI-TOF of 4.</i>                                                                                                                                                                 | S5              |
| <b>Figure S5</b>         | <i><sup>1</sup>H NMR spectrum (400 MHz, CDCl<sub>3</sub>) of 5.</i>                                                                                                                    | S6              |
| <b>Figure S6</b>         | <i><sup>13</sup>C NMR spectrum (400 MHz, CDCl<sub>3</sub>) of 5.</i>                                                                                                                   | S6              |
| <b>Figure S7</b>         | <i>MALDI-TOF of 5.</i>                                                                                                                                                                 | S7              |
| <b>Figure S8</b>         | <i><sup>1</sup>H NMR spectrum (400 MHz, DMSO-d<sub>6</sub>) of LG-P2.</i>                                                                                                              | S7              |
| <b>Figure S9</b>         | <i><sup>13</sup>C NMR spectrum (400 MHz, DMSO-d<sub>6</sub>) of LG-P2.</i>                                                                                                             | S8              |
| <b>Figure S10</b>        | <i>MALDI-TOF of LG-P2</i>                                                                                                                                                              | S8              |
| <b>Figure S11</b>        | <i><sup>1</sup>H NMR spectrum (400 MHz, DMSO-d<sub>6</sub>) of LG-P4.</i>                                                                                                              | S9              |
| <b>Figure S12</b>        | <i><sup>13</sup>C NMR spectrum (400 MHz, DMSO-d<sub>6</sub>) of LG-P4.</i>                                                                                                             | S9              |
| <b>Figure S13</b>        | <i>MALDI-TOF of LG-P4.</i>                                                                                                                                                             | S10             |
| <b>Figure S14</b>        | <i>Absorption spectra of LG-P2 and LG-P4.</i>                                                                                                                                          | S10             |
| <b>Figure S15</b>        | <i>Absorption spectra of LG-P1 and LG-P3 in DCM</i>                                                                                                                                    | S11             |
| <b>Figure S16</b>        | <i>(a) Transport time and (b) charge collection efficiency obtained from transient photovoltage and photocurrent decay measurements.</i>                                               | S11             |
| <b>Figure S17</b>        | <i>Bode plot obtained from EIS measurement in dark (at 0.6V).</i>                                                                                                                      | S12             |
| <b>Table S1</b>          | <i>Singlet excited state properties of dyes by B3LYP method and M06-2X function in tetrahydrofuran solvent in PCM model.</i>                                                           | S13             |
| <b>Table S2</b>          | <i>Comparison of J-V parameters obtained at one sun condition for the best performing DSSCs based on LG-P1 and LG-P3 dyes (previous work) with LG-P2 and LG-P4 dyes (current work)</i> | S14             |
| <b>Table S3</b>          | <i>Comparison Photovoltaic data of LG-P1 and LG-P3 under low light conditions.</i>                                                                                                     | S14             |

|                  |                                                                                             |     |
|------------------|---------------------------------------------------------------------------------------------|-----|
| <b>Table S4.</b> | Photovoltaic data of LG-P2 and LG-P4 based device under 1000 lux daylight LED illumination. | S15 |
|------------------|---------------------------------------------------------------------------------------------|-----|

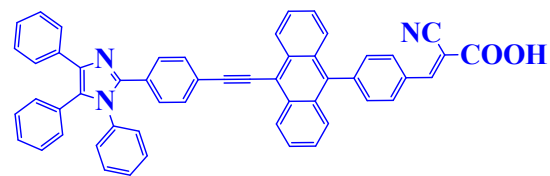

LG-P1

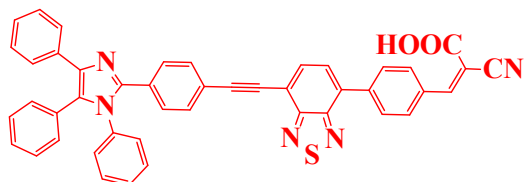

LG-P3

Figure S1. Molecular structures of LG-P1 and LG-P3 sensitizers.

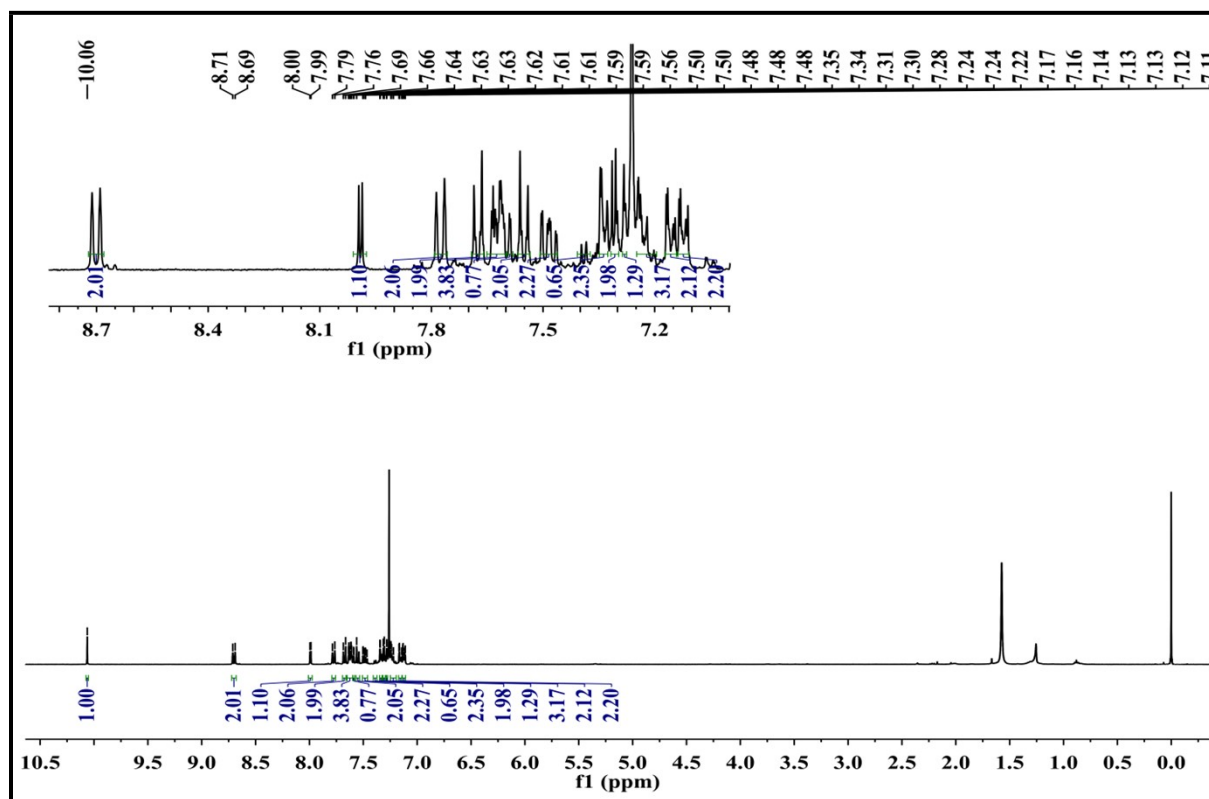

Figure S2:  $^1\text{H}$  NMR spectrum (400 MHz,  $\text{CDCl}_3$ ) of 4.

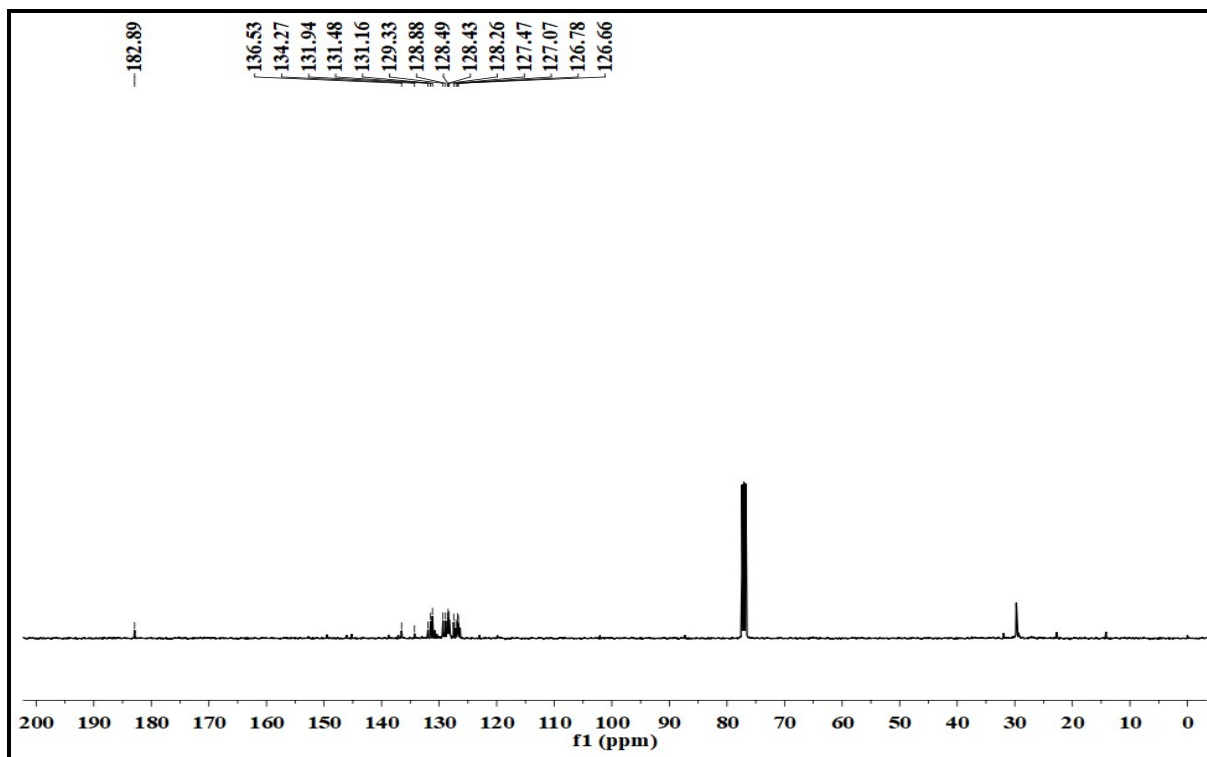

Figure S3:  $^{13}\text{C}$  NMR spectrum (400 MHz,  $\text{CDCl}_3$ ) of 4.

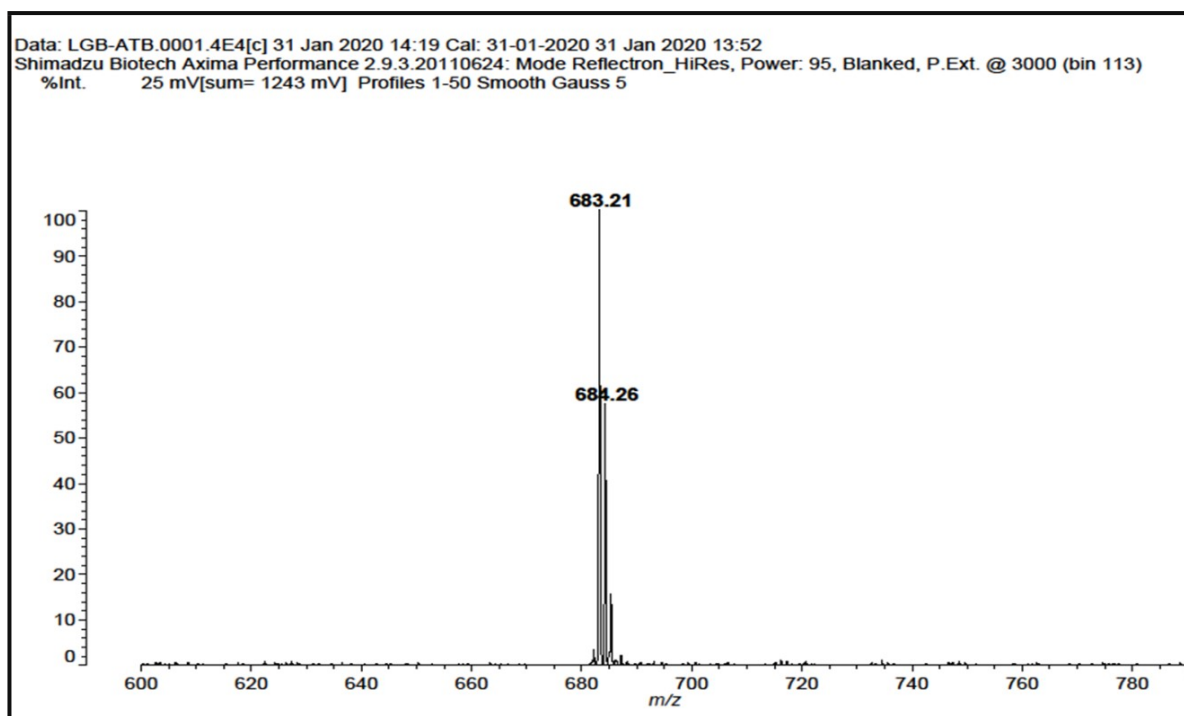

Figure S4: MALDI-TOF of 4.

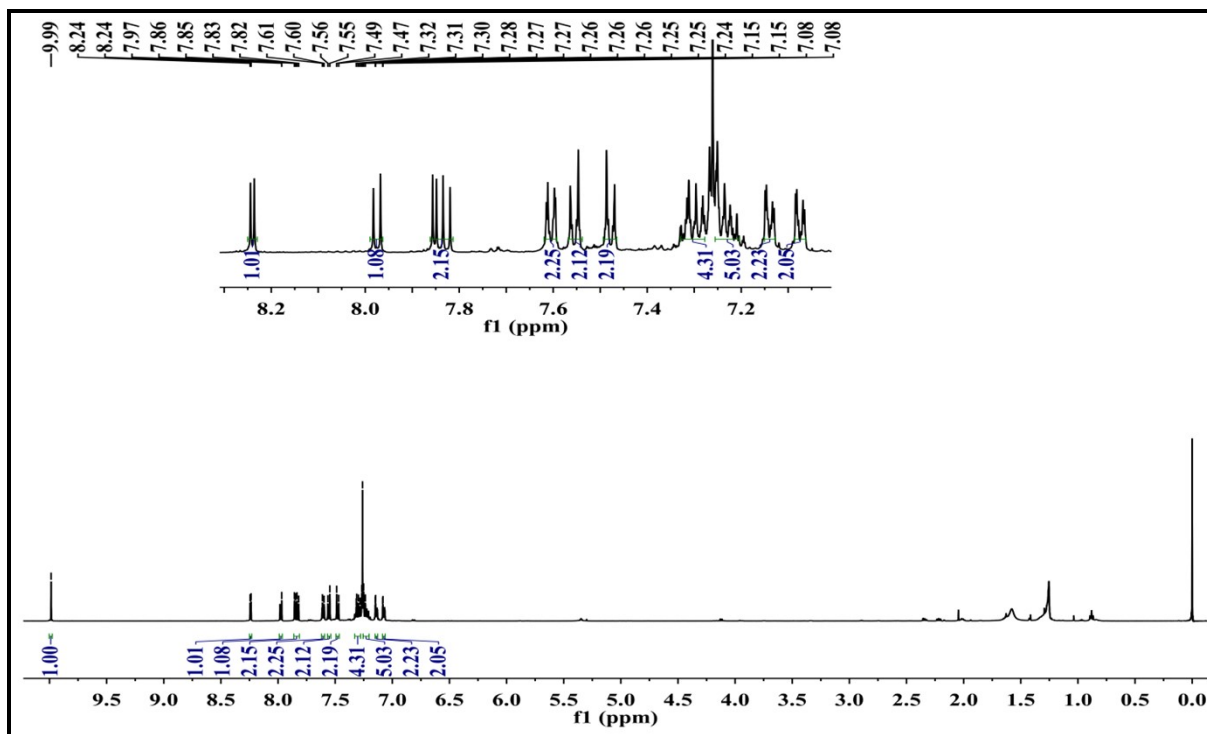

Figure S5:  $^1\text{H}$  NMR spectrum (400 MHz,  $\text{CDCl}_3$ ) of **5**.

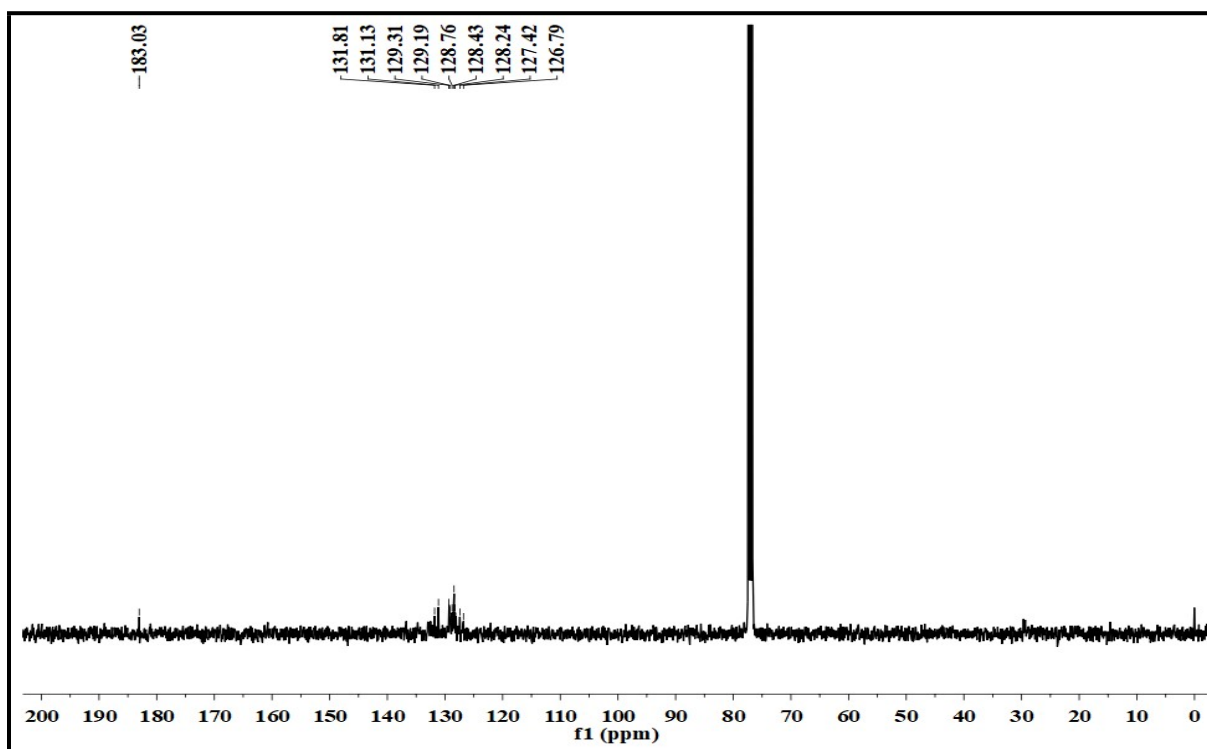

Figure S6:  $^{13}\text{C}$  NMR spectrum (400 MHz,  $\text{CDCl}_3$ ) of **5**.

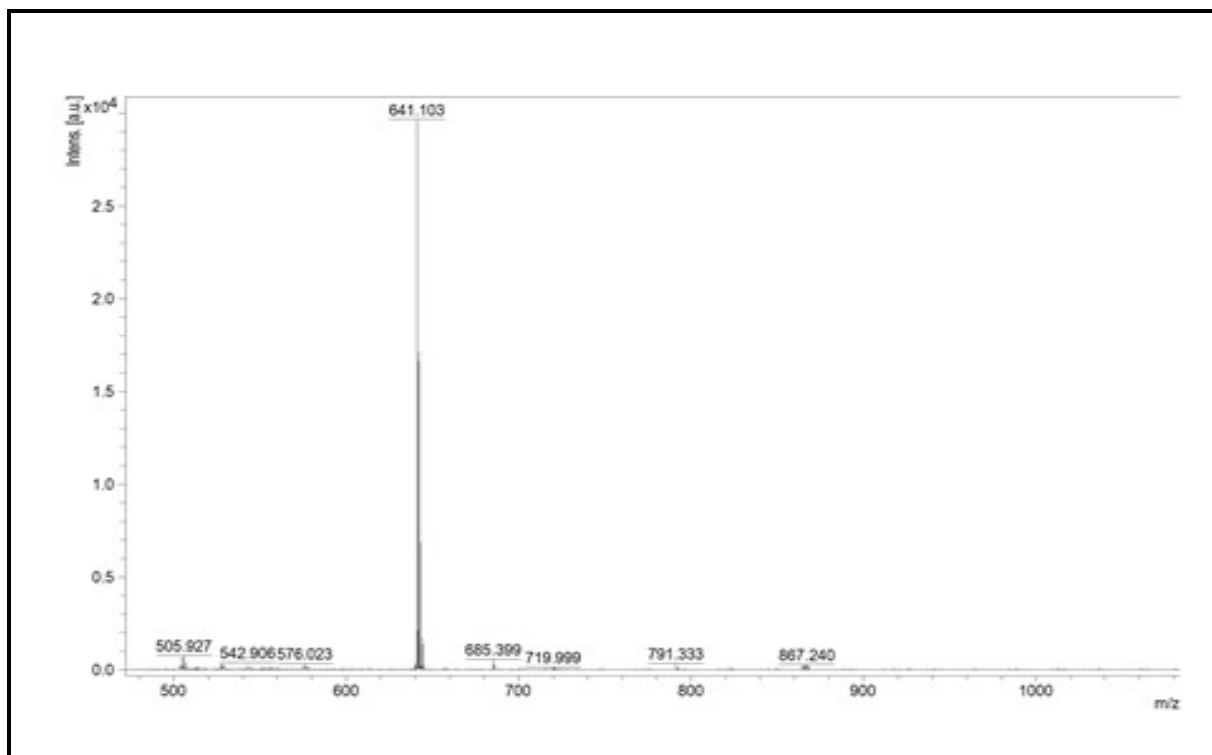

Figure S7: MALDI-TOF of 5.

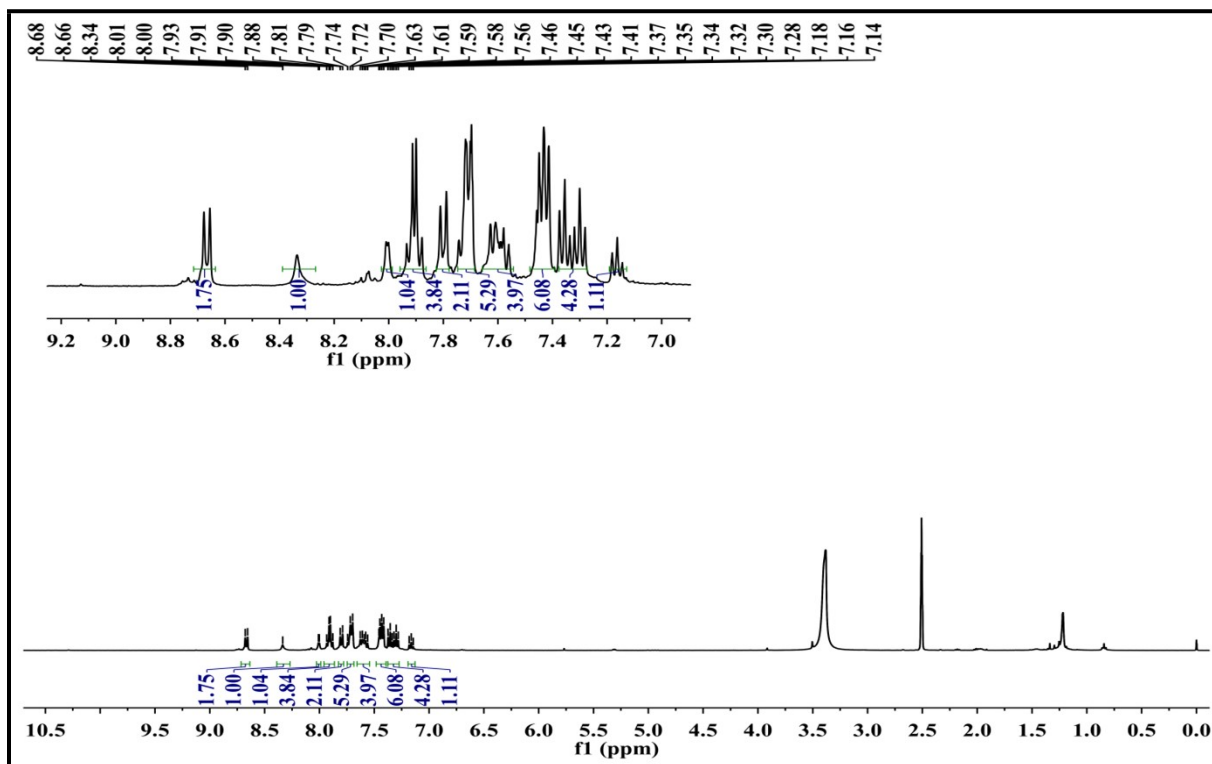

Figure S8: <sup>1</sup>H NMR spectrum (400 MHz, DMSO-d<sub>6</sub>) of LG-P2.

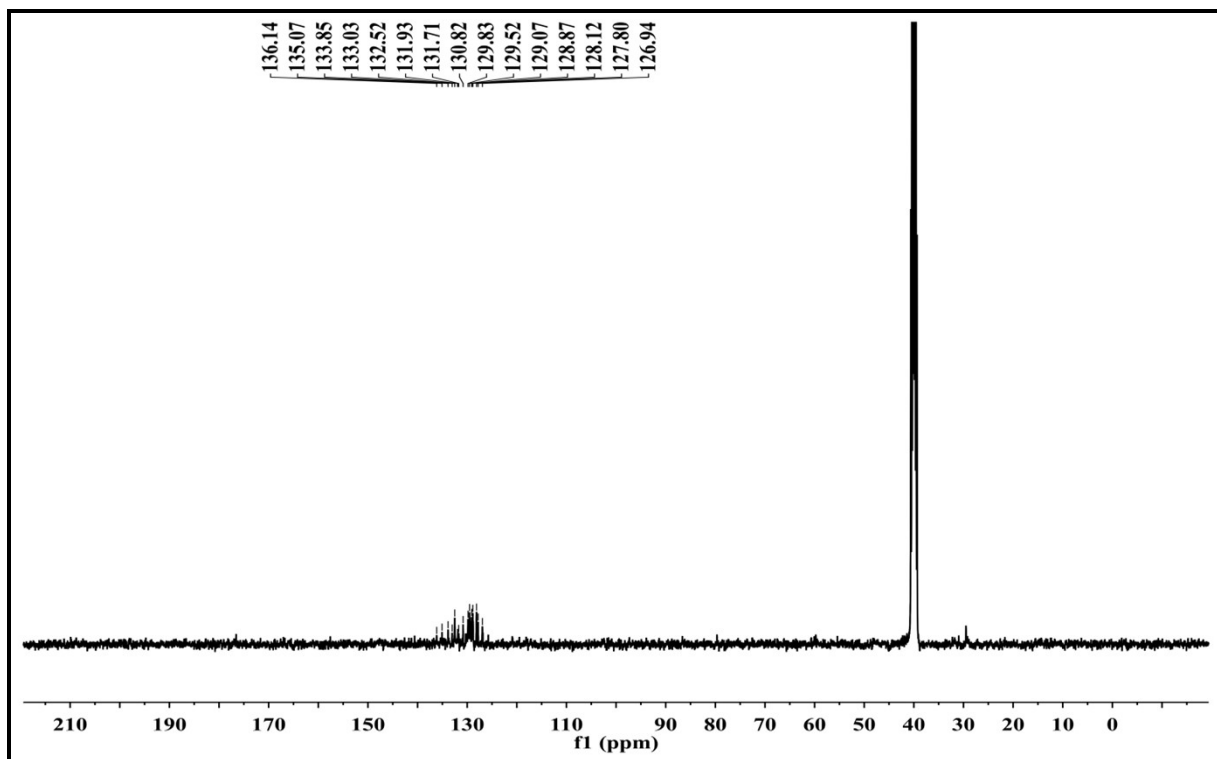

Fi

Figure S9:  $^{13}\text{C}$  NMR spectrum (400 MHz,  $\text{DMSO-d}_6$ ) of *LG-P2*.

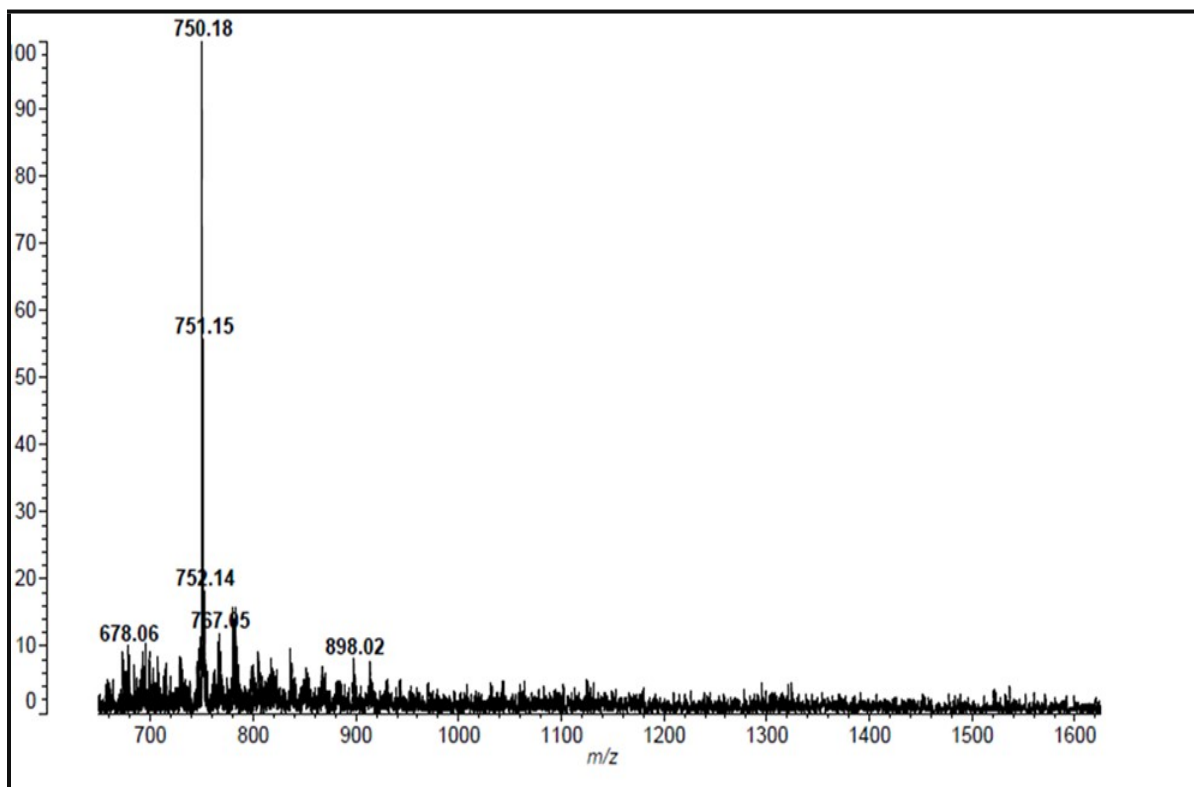

Figure S10: MALDI-TOF of *LG-P2*.



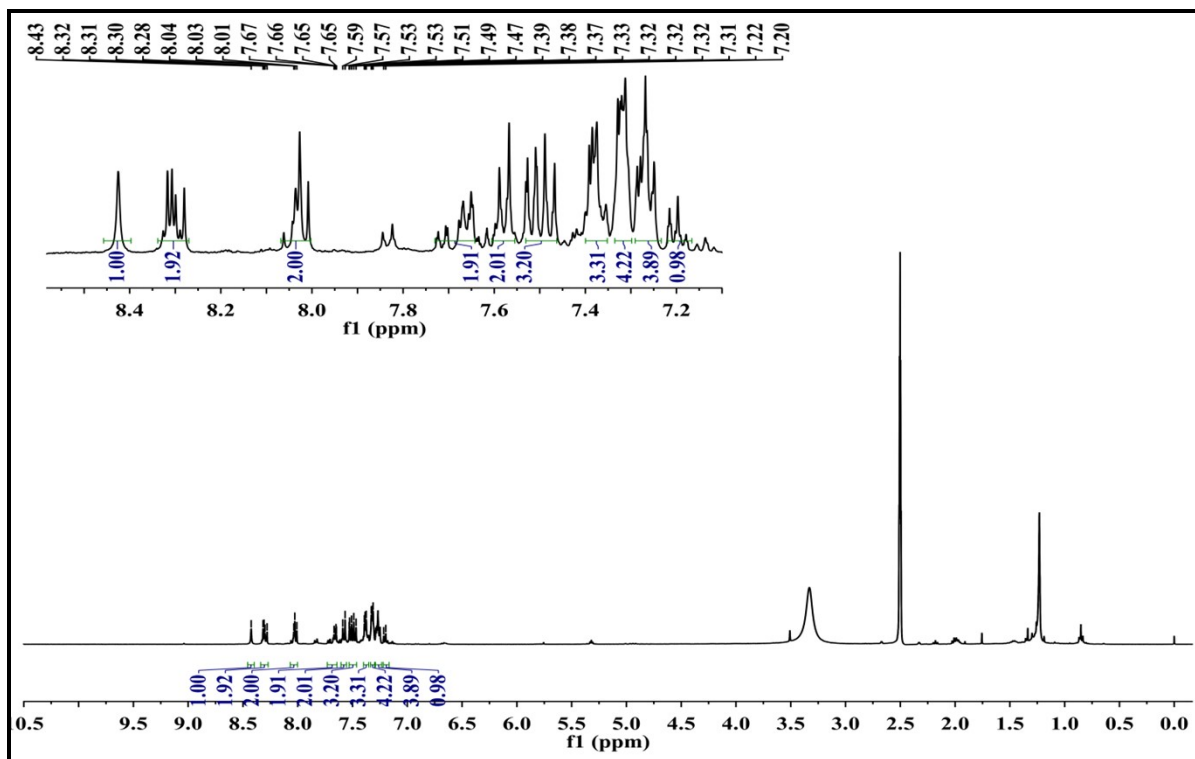

Figure S11:  $^1\text{H}$  NMR spectrum (400 MHz,  $\text{DMSO-d}_6$ ) of LG-P4.

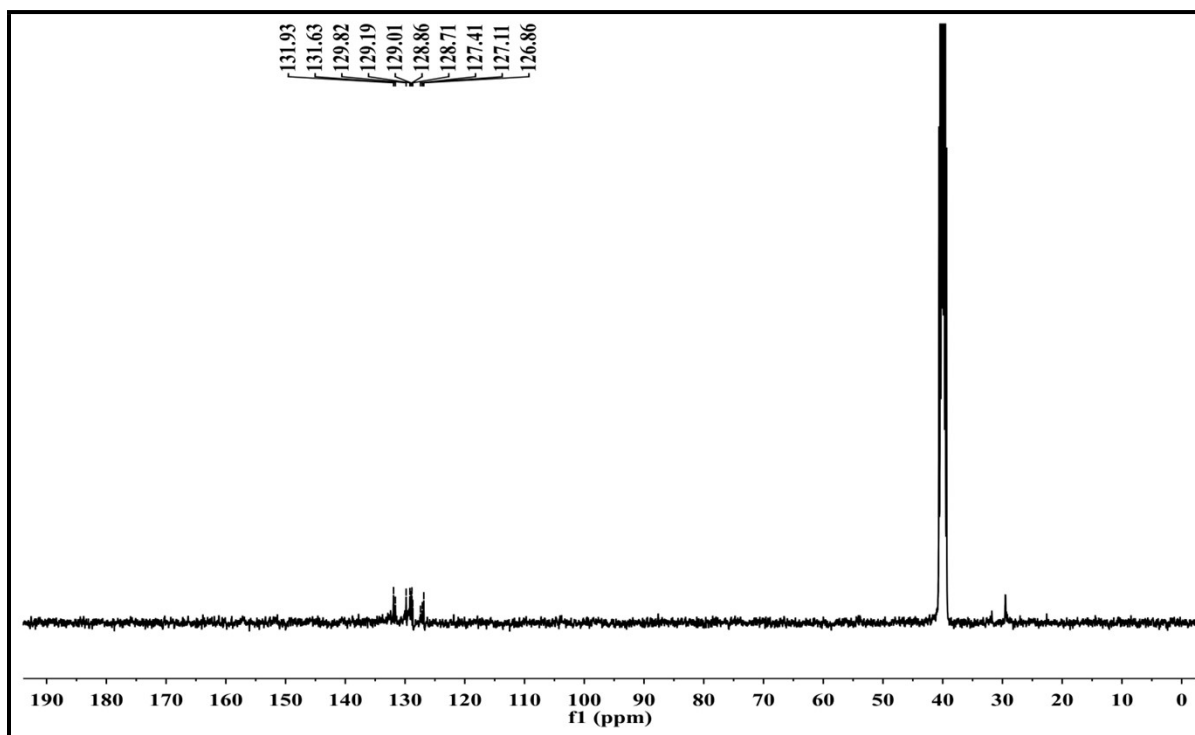

Figure S12:  $^{13}\text{C}$  NMR spectrum (400 MHz,  $\text{DMSO-d}_6$ ) of LG-P4.

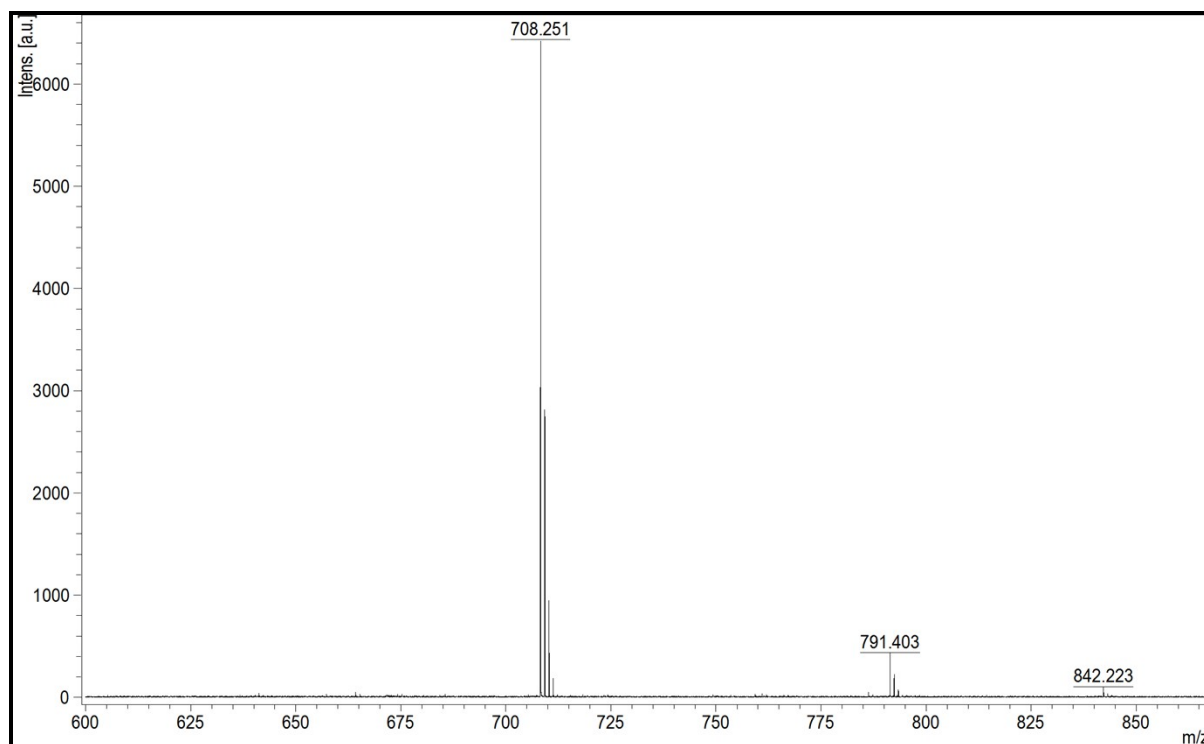

Figure S13: MALDI-TOF of LG-P4.

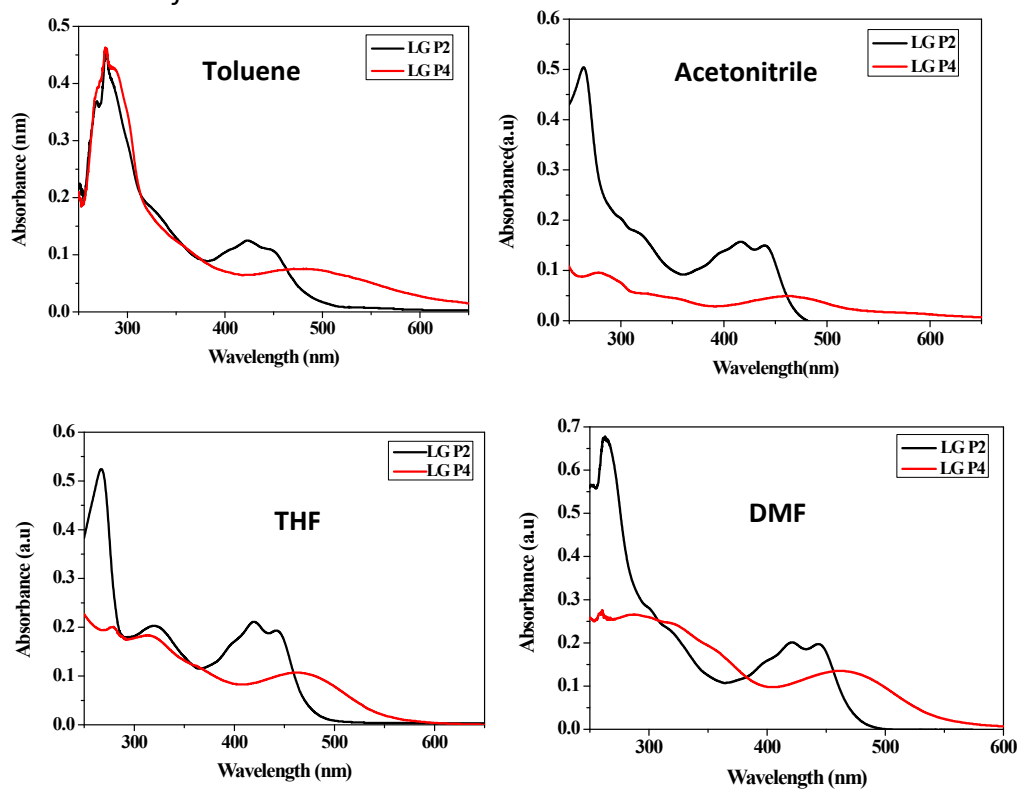

Figure S14: Absorption spectra of LG-P2 and LG-P4.

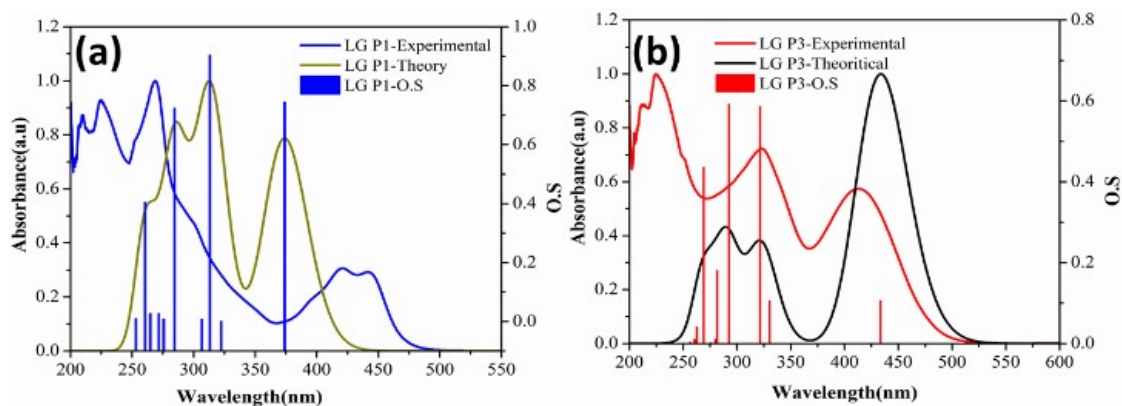

**Figure S15:** Absorption spectra of LG-P1 and LG-P3 in DCM

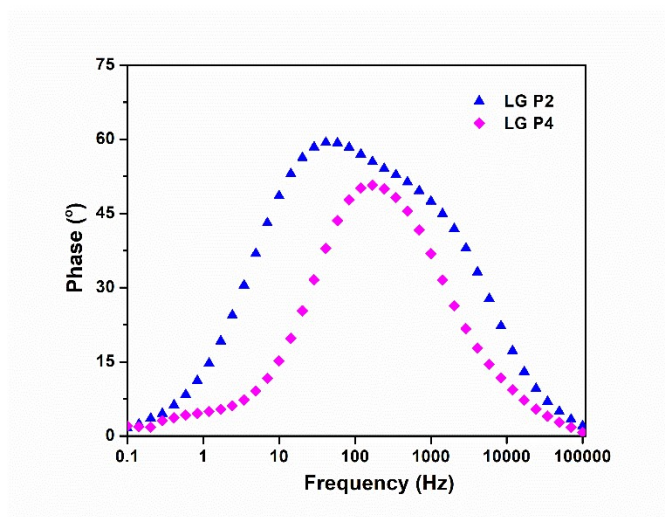

**Figure S16.** Bode plot obtained from EIS measurement in dark (at 0.6V).

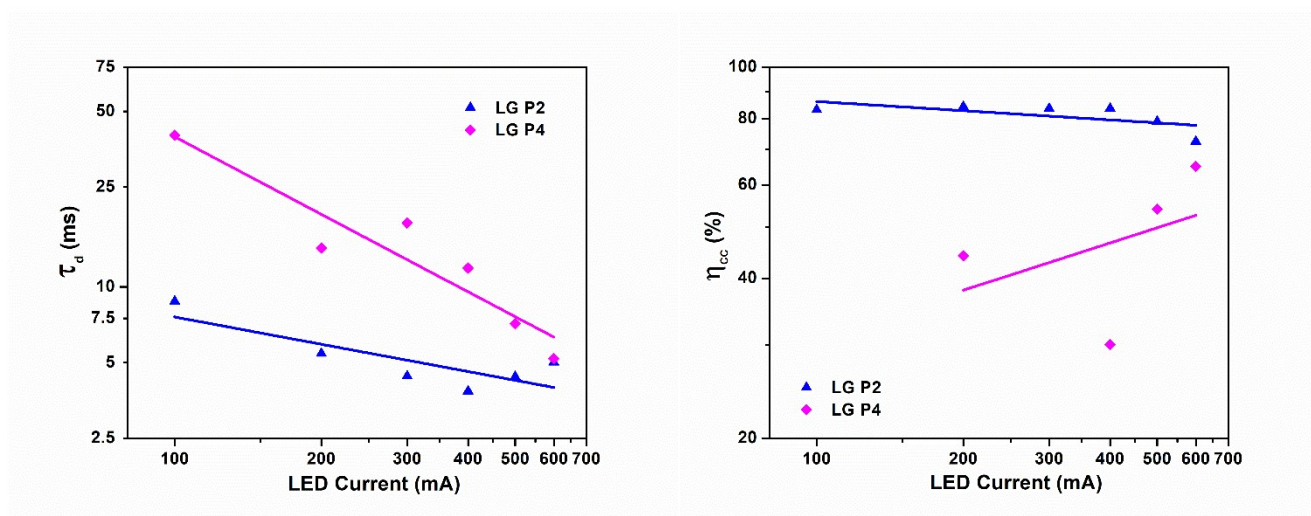

**Figure S17.** (a) Transport time and (b) charge collection efficiency obtained from transient photo-voltage and photocurrent decay measurements.

**Table S1.** Singlet excited state properties of dyes by B3LYP method and M06-2X function in tetrahydrofuran solvent in PCM model.

| System       | $\mu g^a$<br>(Debye) | HOMO <sup>a</sup><br>(eV)                                                                     | LUMO <sup>a</sup><br>(eV) | Eg <sup>a</sup> | $\lambda_{abs}^b$<br>(nm) | Os <sup>b</sup> | % of major molecular orbital contribution <sup>b</sup>                |
|--------------|----------------------|-----------------------------------------------------------------------------------------------|---------------------------|-----------------|---------------------------|-----------------|-----------------------------------------------------------------------|
| <b>LG-P2</b> | 8.49                 | 5.19                                                                                          | 2.67                      | 2.52            | 432                       | 1.39            | HOMO->L+1 (78%)                                                       |
|              |                      |                                                                                               |                           |                 | 376                       | 0.00            | H-1->LUMO (14%),<br>HOMO->LUMO (73%)                                  |
|              |                      |                                                                                               |                           |                 | 330                       | 0.57            | H-2->LUMO (92%)                                                       |
|              |                      |                                                                                               |                           |                 | 321                       | 0.76            | H-3->L+1 (11%), H-1->L+1<br>(47%), HOMO->L+2 (23%)                    |
|              |                      |                                                                                               |                           |                 | 316                       | 0.02            | H-5->L+1 (54%), HOMO->L+4<br>(28%)                                    |
|              |                      |                                                                                               |                           |                 | 281                       | 0.13            | H-1->L+1 (14%), HOMO->L+2<br>(63%)                                    |
|              |                      |                                                                                               |                           |                 | 273                       | 0.00            | H-2->L+1 (83%)                                                        |
|              |                      |                                                                                               |                           |                 | 271                       | 0.17            | H-3->L+1 (13%), H-1->L+2<br>(26%), H-1->L+3 (18%),<br>HOMO->L+3 (19%) |
|              |                      |                                                                                               |                           |                 | 270                       | 0.05            | H-13->LUMO (54%), H-9-<br>>LUMO (32%)                                 |
|              |                      |                                                                                               |                           |                 | 269                       | 0.00            | H-11->L+2 (12%), H-10->L+2<br>(12%)                                   |
|              |                      |                                                                                               |                           |                 | <b>LG-P4</b>              | 11.95           | 5.34                                                                  |
| 360          | 0.04                 | H-2->LUMO (17%), H-1-<br>>LUMO (23%), H-1->L+1<br>(12%), HOMO->LUMO (11%),<br>HOMO->L+1 (24%) |                           |                 |                           |                 |                                                                       |
| 340          | 0.27                 | H-1->LUMO (20%), H-1->L+1<br>(32%), HOMO->LUMO (15%),<br>HOMO->L+1 (17%)                      |                           |                 |                           |                 |                                                                       |
| 299          | 0.70                 | H-10->LUMO (11%), HOMO-<br>>L+2 (60%)                                                         |                           |                 |                           |                 |                                                                       |
| 297          | 0.01                 | H-2->LUMO (41%)                                                                               |                           |                 |                           |                 |                                                                       |
| 291          | 0.15                 | H-10->LUMO (60%)                                                                              |                           |                 |                           |                 |                                                                       |
| 285          | 0.16                 | H-10->LUMO (60%)                                                                              |                           |                 |                           |                 |                                                                       |
| 282          | 0.00                 | H-12->LUMO (63%), H-12-<br>>L+1 (12%)                                                         |                           |                 |                           |                 |                                                                       |
| 269          | 0.32                 | H-1->L+3 (14%), HOMO->L+3<br>(54%)                                                            |                           |                 |                           |                 |                                                                       |
| 266          | 0.06                 | H-2->L+1 (17%), H-1->L+1<br>(18%), HOMO->L+1 (27%)                                            |                           |                 |                           |                 |                                                                       |

<sup>a</sup>Theoretical absorbance in nm, <sup>b</sup>Oscillator strength, and <sup>c</sup>Excited state energy in eV.

**Table S2.** Comparison of J-V parameters obtained at one sun condition for the best performing DSSCs based on LG-P1 and LG-P3 dyes (previous work) with **LG-P2** and **LG-P4** dyes (current work)

|                      | <b>Dye</b>   | $V_{oc}$ (V) | $J_{sc}$ (mA cm <sup>-2</sup> ) | <b>FF (%)</b> | <b>PCE (%)</b> |
|----------------------|--------------|--------------|---------------------------------|---------------|----------------|
| <b>Previous work</b> | <b>LG-P1</b> | 0.47         | 1.52                            | 41.1          | 0.29           |
|                      | <b>LG-P3</b> | 0.73         | 3.81                            | 70.5          | 1.96           |
| <b>This work</b>     | <b>LG-P2</b> | 0.74         | 2.71                            | 70.5          | 1.41           |
|                      | <b>LG-P4</b> | 0.50         | 1.82                            | 47.3          | 0.43           |

**Table S3.** Photovoltaic data of LG-P2 and LG-P4 based device under 0.1 and 0.5 sun conditions.

| <b>Illumination intensity (mW/cm<sup>2</sup>)</b> | <b>Dye</b>   | $V_{oc}$ (V) | $J_{sc}$ (mAcm <sup>-2</sup> ) | <b>FF (%)</b> | <b>Efficiency (%)</b> |
|---------------------------------------------------|--------------|--------------|--------------------------------|---------------|-----------------------|
| <b>50</b>                                         | <b>LG-P2</b> | 0.69         | 1.30                           | 74.2          | 1.33                  |
|                                                   | <b>LG-P4</b> | 0.44         | 0.89                           | 40.1          | 0.31                  |
| <b>10</b>                                         | <b>LG-P2</b> | 0.63         | 0.31                           | 71.9          | 1.39                  |
|                                                   | <b>LG-P4</b> | 0.24         | 0.24                           | 33.8          | 0.20                  |

**Table S4.** Photovoltaic data of LG-P2 and LG-P4 based device under 1000 lux daylight LED illumination.

| <b>Dye</b>   | <b>V<sub>oc</sub> (V)</b> | <b>J<sub>sc</sub><br/>(<math>\mu\text{Acm}^{-2}</math>)</b> | <b>FF<br/>(%)</b> | <b>Efficiency<br/>(%)</b> |
|--------------|---------------------------|-------------------------------------------------------------|-------------------|---------------------------|
| <b>LG-P2</b> | 0.50                      | 93.1                                                        | 51.6              | 7.46                      |
| <b>LG-P4</b> | 0.12                      | 87.3                                                        | 28.7              | 0.97                      |
